# Supplementary material for: Hemi-methylamine lithium borohydride as electrolyte for all-solid-state batteries
Source: Royal Society of Chemistry journal article supplement (doi:10.1039/d3ta03911k), 2023-01-01
Supplement: d3ta03911k1.pdf [file d3ta03911k1.pdf]

## **Supporting Information**

# **Hemi-Methylamine Lithium Borohydride as Electrolyte for All-Solid-State Batteries**

Jakob B. Grinderslev, Lasse N. Skov and Torben R. Jensen\*

Interdisciplinary Nanoscience Center (iNANO) and Department of Chemistry, Aarhus University,  
Langelandsgade 140, DK-8000 Aarhus C, Denmark

\* Corresponding author: [trj@chem.au.dk](mailto:trj@chem.au.dk), Tel: +45 8942 3894

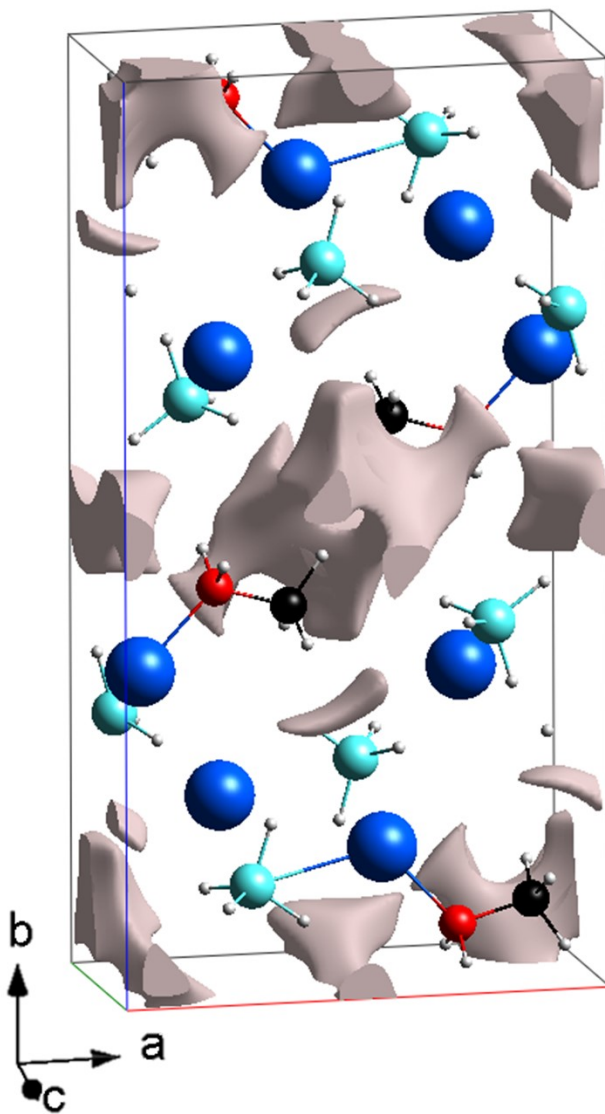

**Figure S1.** Crystal voids analysis of  $\text{LiBH}_4 \cdot \frac{1}{2}\text{CH}_3\text{NH}_2$  using Crystal explorer and the standard isovalue of  $0.002 \text{ e} \cdot \text{au}^{-3}$ . Color scheme: Li (blue), B (light blue), N (red), C (black), H (grey). The light purple ribbons illustrate voids.

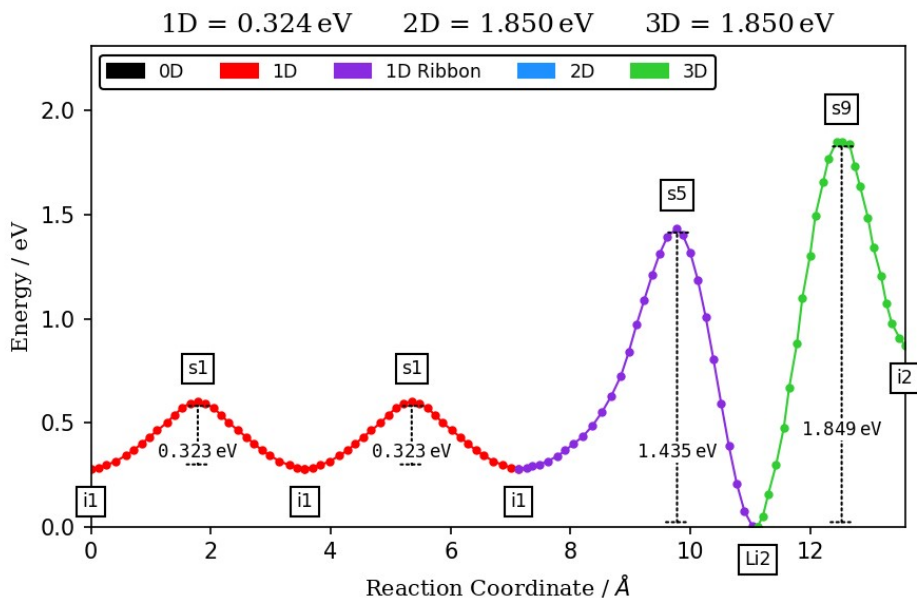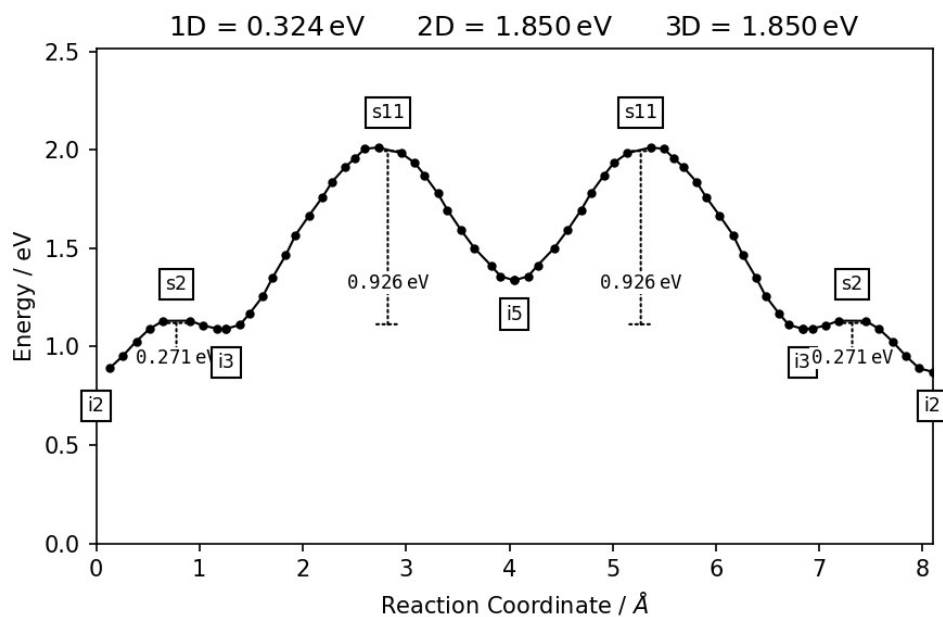

**Figure S2.** Energy barriers of the  $\text{Li}^+$  ion migration pathway in the  $\text{LiBH}_4 \cdot \frac{1}{2}\text{CH}_3\text{NH}_2$  unit cell as calculated by the software SoftBV using the Bond-Valence approach. a) shows the energy profile for conduction pathway A (1D) and the complete energy landscape for a three-dimensional conduction pathway, which also include a framework  $\text{Li}^+$ . b) shows the energy profile for conduction pathway B. Note that SoftBV calculates for a static structure.

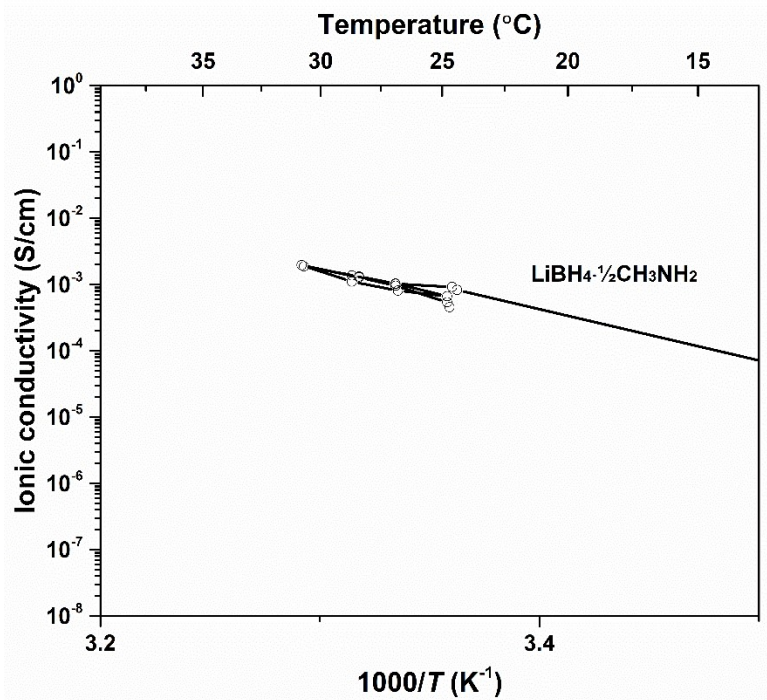

**Figure S3.** Temperature-dependent ionic conductivity of  $\text{LiBH}_4 \cdot \frac{1}{2}\text{CH}_3\text{NH}_2$  upon cycling.

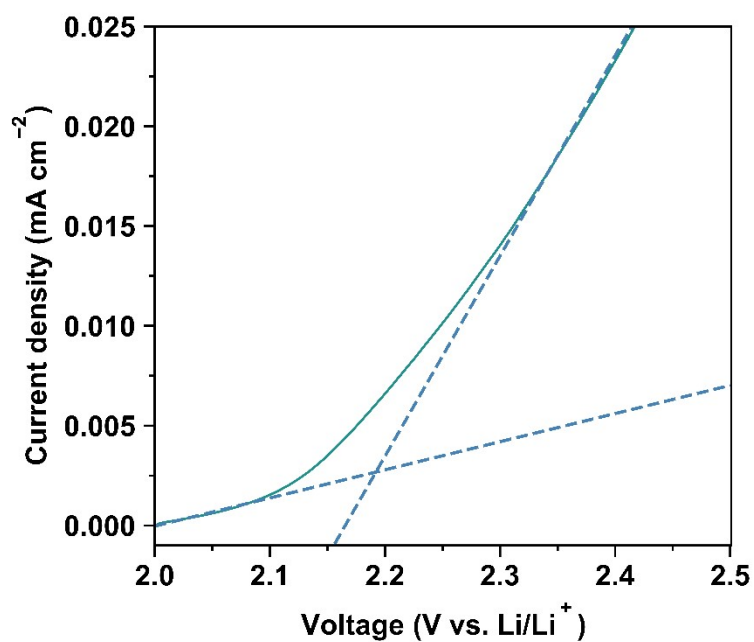

**Figure S4.** Linear sweep voltammetry of  $\text{LiBH}_4 \cdot \frac{1}{2}\text{CH}_3\text{NH}_2$  in a two electrode setup with Li as counter/reference electrode and Mo as working electrode recorded at  $T = 30 \text{ }^\circ\text{C}$  with a scan rate  $v = 1 \text{ mV s}^{-1}$  in the potential range from OCV to  $2.4 \text{ V}$  to evaluate the oxidative stability.

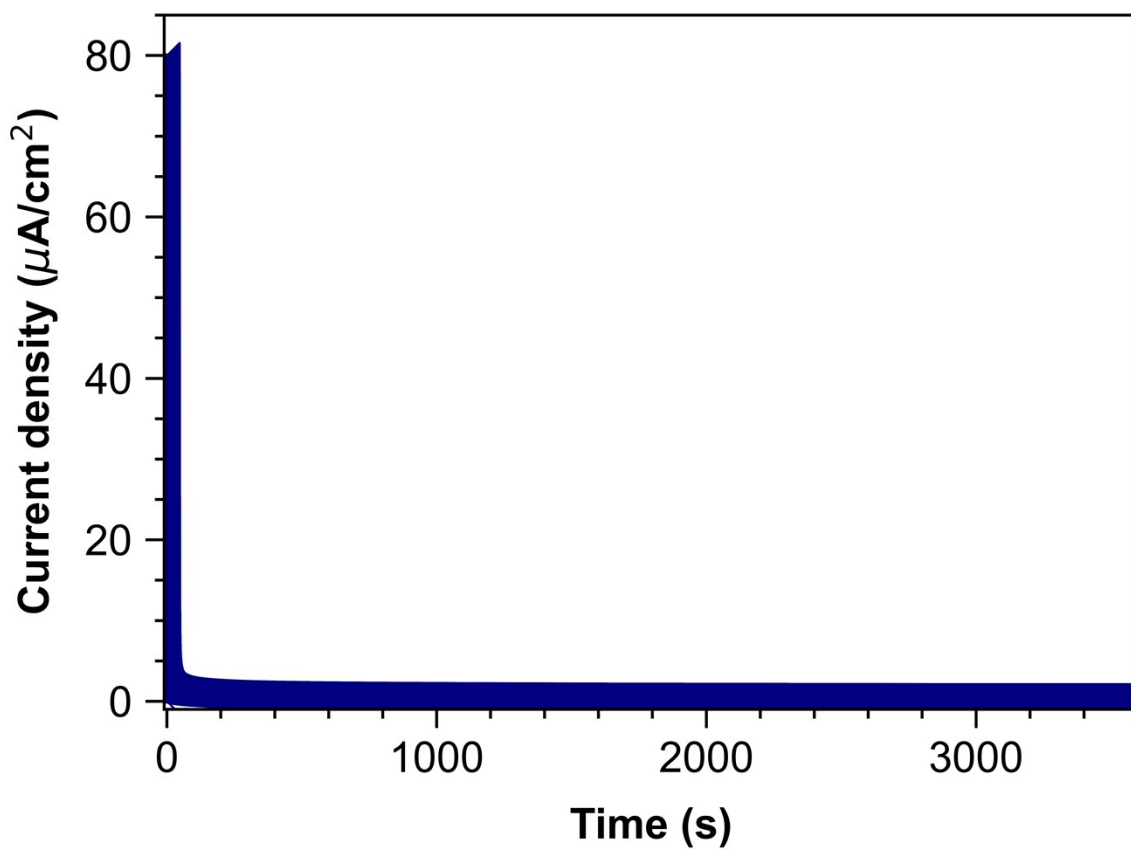

**F**

**figure S5.** Chronoamperometry in a symmetric  $\text{Mo}|\text{LiBH}_4 \cdot \frac{1}{2}\text{CH}_3\text{NH}_2|\text{Mo}$  cell at  $30^\circ\text{C}$  by applying 0.5 V for 1 h

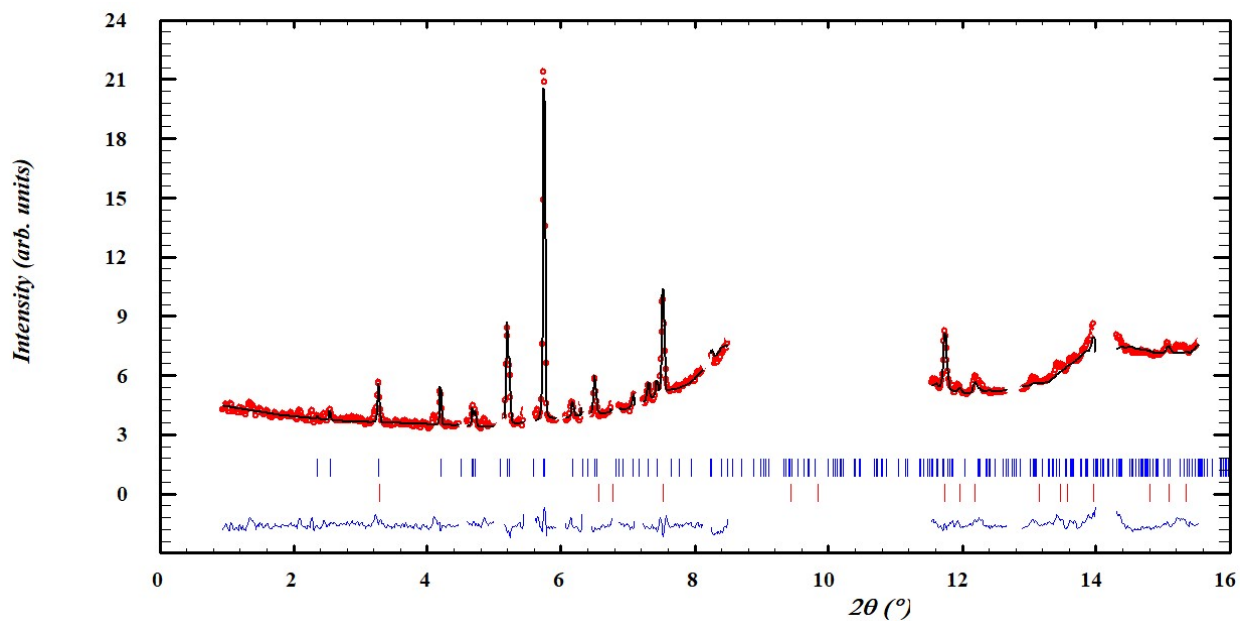

**Figure S6.** Rietveld refinement of the *in operando* data collected for Li|LiBH<sub>4</sub>·½CH<sub>3</sub>NH<sub>2</sub>|TiS<sub>2</sub> from SR PXD data measured at room temperature,  $\lambda = 0.3542 \text{ \AA}$ , showing experimental (red circles) and calculated (black line) PXD patterns, and a difference plot below (blue line). Blue tick marks: LiBH<sub>4</sub>·½CH<sub>3</sub>NH<sub>2</sub>, red tick marks: TiS<sub>2</sub>. Final discrepancy factors:  $R_p = 2.65 \%$ ,  $R_{wp} = 3.40 \%$  (not corrected for background),  $R_p = 45.6 \%$ ,  $R_{wp} = 23.2 \%$  (conventional Rietveld R-factors). The ranges containing scattering from the Al-windows and Li-metal has been excluded in the refinement.
